# Supplementary material
Source: PubMed Central journal article supplement (PMC2970636)
Supplement: NIHMS224724-supplement-1.pdf [file NIHMS224724-supplement-1.pdf]

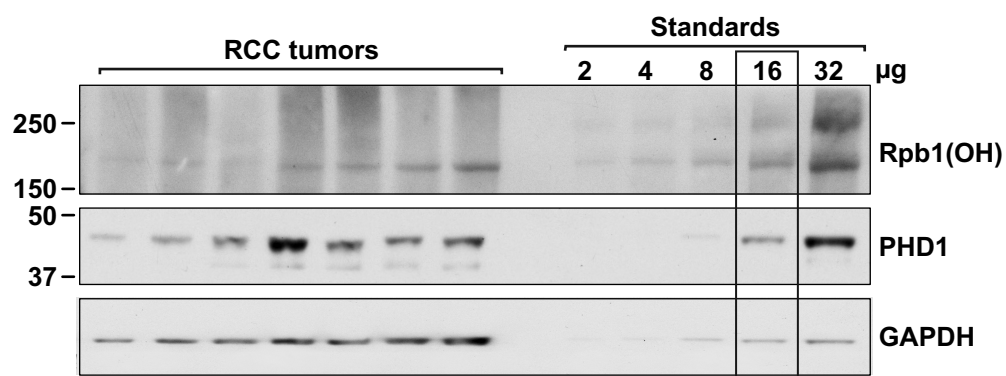

**Figure S1. Representative western blot showing molecular standards used for normalization of individual proteins among all the gels run for all the tumors or kidneys.** A sample running in the linear range of standards (rectangle) was used for normalization. In addition, all samples were normalized to the levels of GAPDH.

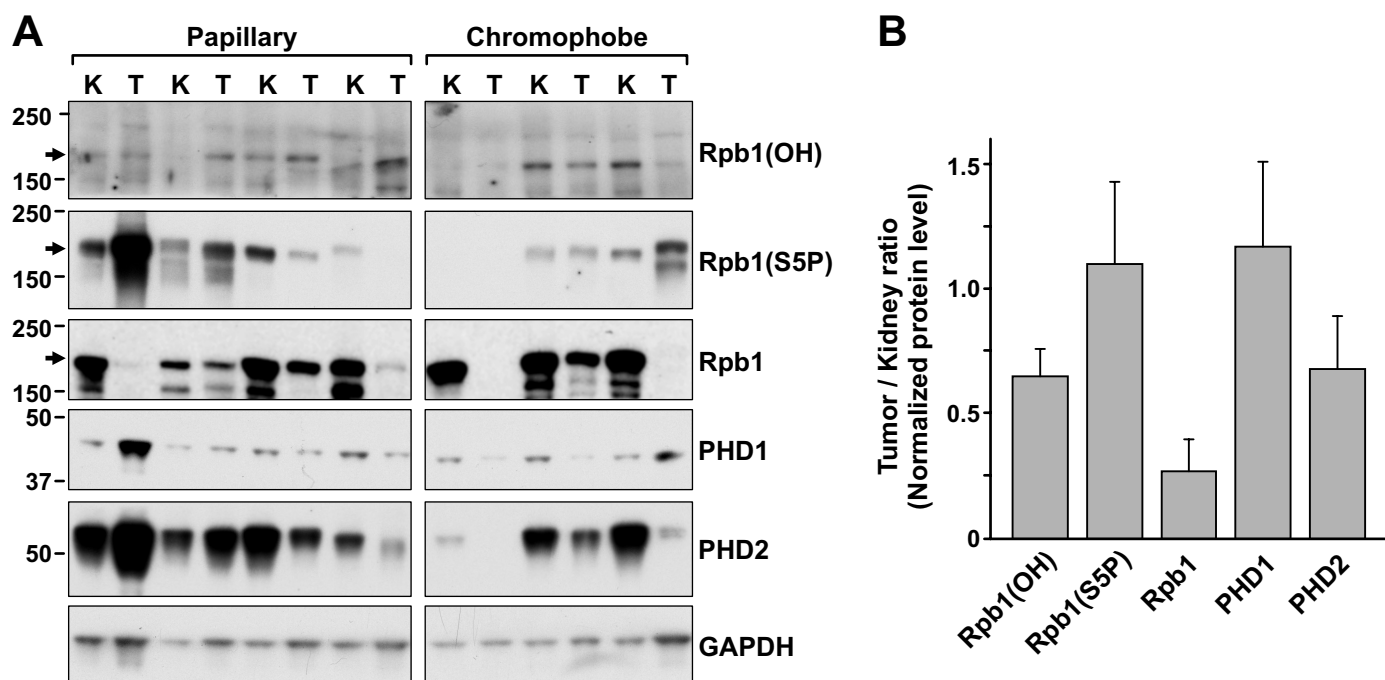

**Figure S2.** Western blots of extracts from four papillary and three chromophobe renal tumors and matched normal kidneys probed with the indicated antibodies (**A**). (**B**) Quantification of the tumor/kidney ratio was performed by first normalizing the optical density of relevant bands to the optical density of GAPDH bands and then calculating the T/K ratio. The analysis to date, although on a very small sample, does not indicate increases in Rpb(OH), PHD1 or PHD2 in these tumors as compared to matched kidneys.

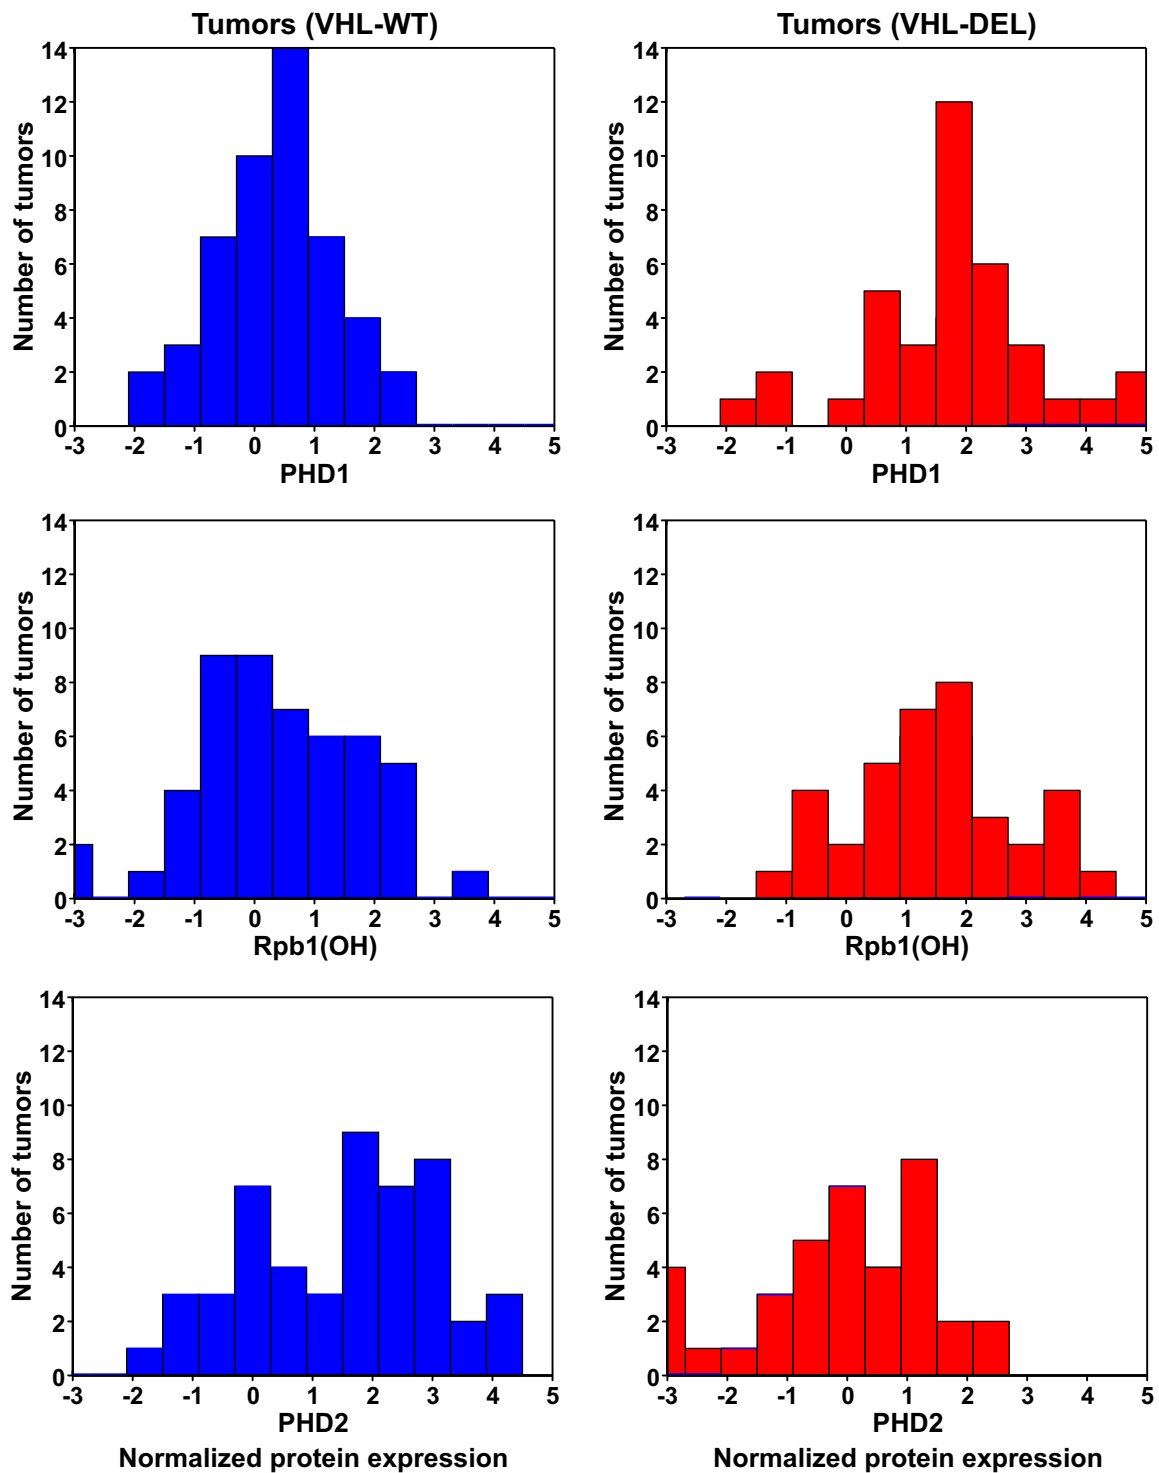

**Figure S3. Histograms of the distributions of PHD1, Rpb1(OH), and PHD2 levels in VHL-WT (red bars) and -DEL (blue bars) tumors.** The normalized expression levels for each protein are shown on the x-axis, and the number of tumors at a given expression level are shown on the y-axis. For example, there are 10 VHL-DEL and 1 VHL-WT tumors with PHD1 expression levels in the interval around 0 (bar #4 in the top panels). The bars at either end of the histogram account for all cases with values below -3 or above 5. The separation between distributions for VHL-WT and -DEL cases is most pronounced for PHD1, which is also reflected in multivariate decision tree-based analysis Fig. 3A).

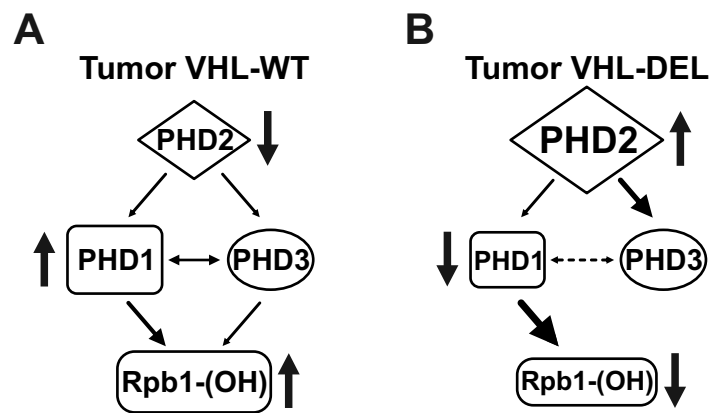

**Figure S4. Proposed model for the regulation of Rpb1(OH) in RCC VHL-WT (A) and VHL-DEL (B) tumors.** In VHL-WT tumors, Rpb1 is hydroxylated by PHD1 and PHD3, and relatively lower levels of PHD2 do not inhibit this hydroxylation, or inhibit it to a lesser degree. In VHL-DEL tumors, higher levels of PHD2 titrate PHD3 away from Rpb1, leaving PHD1 as the only hydroxylase and resulting in an overall lower, but primarily PHD1-mediated, Rpb1 hydroxylation.

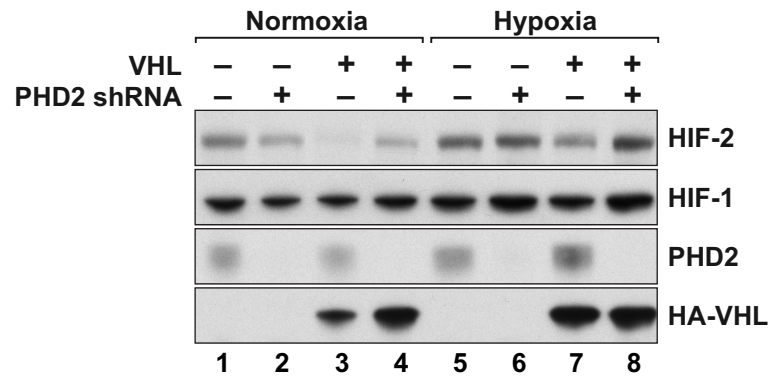

**Figure S5. Knockdown of PHD2 in 786-O VHL cells induces accumulation of HIF-2 to levels similar to those measured in VHL(-) cells under both normoxic and hypoxic conditions.** Western blot analysis of the indicated proteins. The control samples were treated with scramble shRNA.

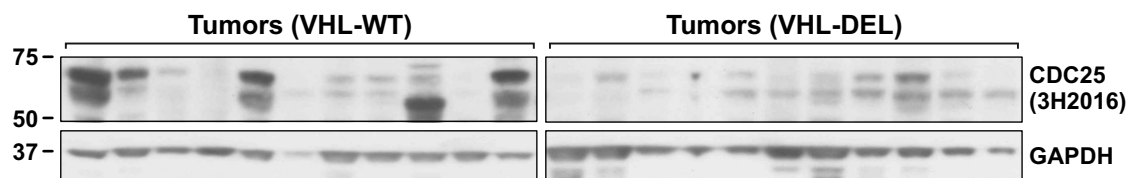

**Figure S6. Western blot of CDC25A in a representative set of VHL-WT and VHL-DEL RCC tumors.** Santa Cruz monoclonal antibody 3H2016 was used for immunoblotting. In human RCC tumors, the antibody detects two bands between 50 and 75 kD markers. These bands most likely correspond to different phosphorylation forms or splice variants of CDC25A.

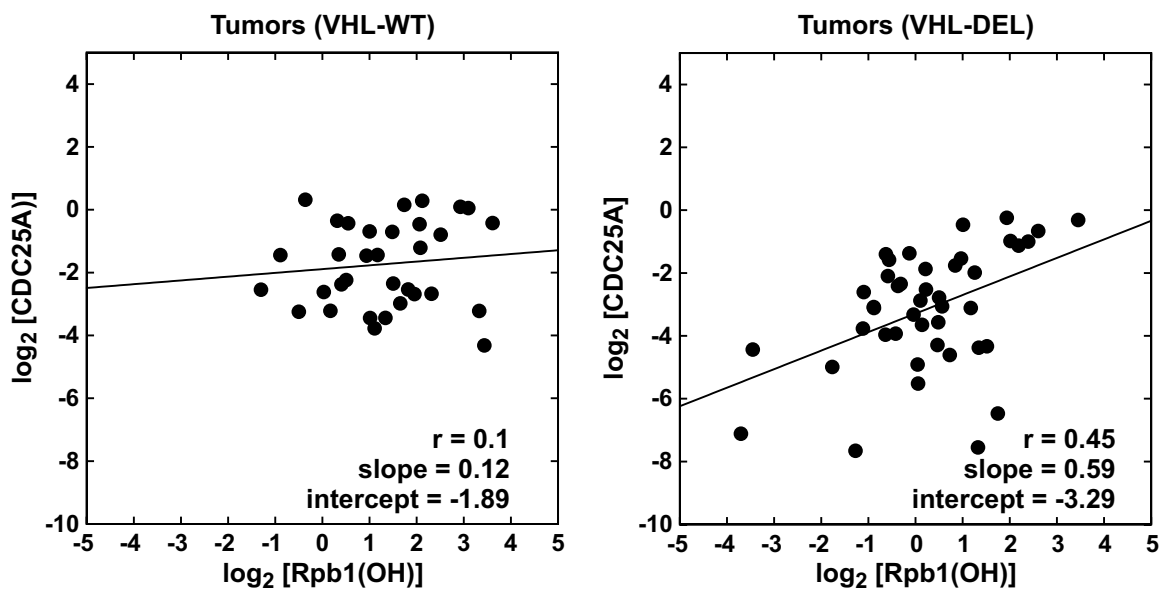

**Figure S7. Regression analysis of CDC25A levels as function of Rpb1(OH) levels in tumor samples stratified by VHL gene status.** Each dot represents a sample and the solid line represents the linear regression fit, with the Pearson correlation coefficients ( $r$ ) as well as the slope and intercept of the fitted line shown in the lower right corner of each box. \*\*  $p < 0.01$

**Table S1. Sequence of forward and reverse primers used for RT-PCR of the indicated human mRNAs.**

---

|                |   |    |                          |    |               |    |                               |
|----------------|---|----|--------------------------|----|---------------|----|-------------------------------|
| <b>hVEGF-A</b> | F | 5' | TTTCTGCTGTCTTGGGTGCATTGG | 3' | <b>hVEGFb</b> | 5' | CTGCGAAGGTGACACATGGCTTTT      |
| <b>hVEGF-A</b> | F | 5' | TTTCTGCTGTCTTGGGTGCATTGG | 3' | <b>hVEGFb</b> | 3' | GCAAGTCACCCTGCTGAGTCT         |
| <b>GLUT-1</b>  | F | 5' | CCGGCGGAATTCAATGCTGATGAT | 3' | <b>hVEGFc</b> | 5' | CCAGAAATCAACCCCTAAATCCTGGAAAA |
| <b>hGLUT-1</b> | F | 5' | CCGGCGGAATTCAATGCTGATGAT | 3' | <b>hVEGFc</b> | 3' | CCATAATAGAAAATCGATGAACTGGAAAA |
| <b>GLUT-1</b>  | B | 5' | TCAGCATCTCAAAGGACTTGCCCA | 3' |               |    |                               |

---



**Table S2. Summary of general information on all human RCC tumors used for analysis**

|                                       |            |
|---------------------------------------|------------|
| <b>total # of kidneys</b>             | <b>114</b> |
| <b>total # of tumors</b>              | <b>128</b> |
| <b># of tumors with known grade</b>   | <b>114</b> |
| <b>G1</b>                             | <b>10</b>  |
| <b>G2</b>                             | <b>64</b>  |
| <b>G3</b>                             | <b>32</b>  |
| <b>G4</b>                             | <b>8</b>   |
| <b>unknown</b>                        | <b>14</b>  |
| <b>tumor stage:</b>                   |            |
| <b>0</b>                              | <b>1</b>   |
| <b>1</b>                              | <b>6</b>   |
| <b>1a</b>                             | <b>25</b>  |
| <b>1b</b>                             | <b>20</b>  |
| <b>2</b>                              | <b>11</b>  |
| <b>3</b>                              | <b>3</b>   |
| <b>3a</b>                             | <b>11</b>  |
| <b>3b</b>                             | <b>11</b>  |
| <b>3c</b>                             | <b>1</b>   |
| <b>unknown</b>                        | <b>39</b>  |
| <b>VHL gene status:</b>               |            |
| <b>wild type</b>                      | <b>46</b>  |
| <b>missense point mutations</b>       | <b>17</b>  |
| <b>hypermethylation</b>               | <b>13</b>  |
| <b>frameshift, nonsense mutations</b> | <b>52</b>  |

**Table S3.** Status of the *VHL* gene sequence and promoter hypermethylation in all investigated RCC tumors. (WT - wild-type; PM/MS - missense point mutations; HypMe - hypermethylated; DEL - frameshift (FS), nonsense (Non), in-frame-deletion (IFD) mutations; nd - not determined)

| Tumor ID | VHL Gene | Grade and pTNM | HypMe | Mutation                |                           |         |                                       |               |
|----------|----------|----------------|-------|-------------------------|---------------------------|---------|---------------------------------------|---------------|
|          |          |                |       | Genomic change          | mRNA change               | Exon    | Codon and predicted amino acid change | Mutation type |
| 1        | WT       | G2 T1a         | No    | -                       | -                         | -       | -                                     | -             |
| 2        | WT       | G2 T1a         | No    | -                       | -                         | -       | -                                     | -             |
| 3        | WT       | G2 T1a         | No    | -                       | -                         | -       | -                                     | -             |
| 4        | WT       | G2 T1a         | No    | -                       | -                         | -       | -                                     | -             |
| 5        | WT       | G2 T1a         | No    | -                       | -                         | -       | -                                     | -             |
| 6        | WT       | G2 T1a         | No    | -                       | -                         | -       | -                                     | -             |
| 7        | WT       | G2 T1a         | No    | -                       | -                         | -       | -                                     | -             |
| 8        | WT       | G2 T1a         | No    | -                       | -                         | -       | -                                     | -             |
| 9        | WT       | G2 T1a         | No    | -                       | -                         | -       | -                                     | -             |
| 10       | WT       | G2 T1a         | No    | -                       | -                         | -       | -                                     | -             |
| 11       | WT       | G2 T1b         | No    | -                       | -                         | -       | -                                     | -             |
| 12       | WT       | G2 T1b         | No    | -                       | -                         | -       | -                                     | -             |
| 13       | WT       | G2 T1b         | No    | -                       | -                         | -       | -                                     | -             |
| 14       | WT       | G2 T1b         | No    | -                       | -                         | -       | -                                     | -             |
| 15       | WT       | G2 T1b         | No    | -                       | -                         | -       | -                                     | -             |
| 16       | WT       | G2 T1b         | No    | -                       | -                         | -       | -                                     | -             |
| 17       | WT       | G2 T1b         | No    | -                       | -                         | -       | -                                     | -             |
| 18       | WT       | G2 T2          | No    | -                       | -                         | -       | -                                     | -             |
| 19       | WT       | G2 T3a         | No    | -                       | -                         | -       | -                                     | -             |
| 20       | WT       | G2 T3b         | No    | -                       | -                         | -       | -                                     | -             |
| 21       | WT       | G2 T3b         | No    | -                       | -                         | -       | -                                     | -             |
| 22       | WT       | G2 T3b         | No    | -                       | -                         | -       | -                                     | -             |
| 23       | WT       | G2 T3b         | No    | -                       | -                         | -       | -                                     | -             |
| 24       | WT       | G2 T3b         | No    | -                       | -                         | -       | -                                     | -             |
| 25       | WT       | G2             | No    | -                       | -                         | -       | -                                     | -             |
| 26       | WT       | G2             | No    | -                       | -                         | -       | -                                     | -             |
| 27       | WT       | G2             | No    | -                       | -                         | -       | -                                     | -             |
| 28       | WT       | G2             | No    | -                       | -                         | -       | -                                     | -             |
| 29       | WT       | G3 T1a         | No    | -                       | -                         | -       | -                                     | -             |
| 30       | WT       | G3 T1b         | No    | -                       | -                         | -       | -                                     | -             |
| 31       | WT       | G3 T1b         | No    | -                       | -                         | -       | -                                     | -             |
| 32       | WT       | G3 T2          | No    | -                       | -                         | -       | -                                     | -             |
| 33       | WT       | G3 T3a         | No    | -                       | -                         | -       | -                                     | -             |
| 34       | WT       | G3 T3b         | No    | -                       | -                         | -       | -                                     | -             |
| 35       | WT       | G3             | No    | -                       | -                         | -       | -                                     | -             |
| 36       | WT       | G3             | No    | -                       | -                         | -       | -                                     | -             |
| 37       | WT       | G3             | No    | -                       | -                         | -       | -                                     | -             |
| 38       | WT       | G3             | No    | -                       | -                         | -       | -                                     | -             |
| 39       | WT       | G4 T3a         | No    | -                       | -                         | -       | -                                     | -             |
| 40       | WT       | G4 T3a         | No    | -                       | -                         | -       | -                                     | -             |
| 41       | WT       | G4 T3b         | No    | -                       | -                         | -       | -                                     | -             |
| 42       | WT       | G4             | No    | -                       | -                         | -       | -                                     | -             |
| 43       | WT       | nd             | No    | -                       | -                         | -       | -                                     | -             |
| 44       | WT       | nd             | No    | -                       | -                         | -       | -                                     | -             |
| 45       | WT       | nd             | No    | -                       | -                         | -       | -                                     | -             |
| 46       | WT       | nd             | No    | -                       | -                         | -       | -                                     | -             |
| 47       | PM       | G1 T1b         | No    | 445 A>C                 | 445 A>C                   | 1       | N78H                                  | MS            |
| 48       | PM       | G1 T1b         | No    | 434 T>A                 | 434 T>A                   | 1       | V74D                                  | MS            |
| 49       | PM       | G1 T3          | No    | 470 C>T                 | 470 C>T                   | 1       | P86L                                  | MS            |
| 50       | PM       | G2 T1a         | No    | 446 A>T                 | 446 A>T                   | 1       | N78I                                  | MS            |
| 51       | PM       | G2 T1a         | No    | 458 G>C                 | 458 G>C                   | 1       | R82P                                  | MS            |
| 52       | PM       | G2 T1a         | No    | 4928 T>A                | 602 T>A                   | 2       | V130D                                 | MS            |
| 53       | PM       | G2 T1a         | No    | 4922 T>A                | 596 T>A                   | 2       | L128H                                 | MS            |
| 54       | PM       | G2 T1b         | No    | 8188 C>G                | 712 C>G                   | 3       | R167G                                 | MS            |
| 55       | PM       | G2             | No    | 4900 G>T                | 574 G>T                   | 2       | D121Y                                 | MS            |
| 56       | PM       | G3 T1a         | No    | 407 C>T                 | 407 C>T                   | 1       | S65L                                  | MS            |
| 57       | PM       | G3 T1b         | No    | 8180 A>T                | 704 A>T                   | 3       | Q164L                                 | MS            |
| 58       | PM       | G3 T3b         | No    | 4991T>A                 | 665 T>A                   | 2       | I151N                                 | MS            |
| 59       | PM       | G3 T3c         | No    | 4889 G>C                | 563 G>C                   | 2       | W117S                                 | MS            |
| 60       | PM       | G3             | No    | 4997 T>G                | 671 T>G                   | 2       | L153R                                 | MS            |
| 61       | PM       | G3             | No    | 4889 G>C                | 563 G>C                   | 2       | W117S                                 | MS            |
| 62       | PM       | G3             | No    | 4882 C>A                | 556 C>A                   | 2       | H115N                                 | MS            |
| 63       | PM       | nd             | No    | 445 A>G                 | 445 A>G                   | 1       | N78D                                  | MS            |
| 64       | HypMe    | G1 T1b         | Yes   | -                       | -                         | -       | -                                     | -             |
| 65       | HypMe    | G2 T1          | Yes   | -                       | -                         | -       | -                                     | -             |
| 66       | HypMe    | G2 T2          | Yes   | -                       | -                         | -       | -                                     | -             |
| 67       | HypMe    | G2             | Yes   | -                       | -                         | -       | -                                     | -             |
| 68       | HypMe    | G2             | Yes   | -                       | -                         | -       | -                                     | -             |
| 69       | HypMe    | G3 T2          | Yes   | -                       | -                         | -       | -                                     | -             |
| 70       | HypMe    | G3 T3a         | Yes   | -                       | -                         | -       | -                                     | -             |
| 71       | HypMe    | G3             | Yes   | -                       | -                         | -       | -                                     | -             |
| 72       | HypMe    | nd             | Yes   | -                       | -                         | -       | -                                     | -             |
| 73       | HypMe    | nd             | Yes   | -                       | -                         | -       | -                                     | -             |
| 74       | HypMe    | nd             | Yes   | -                       | -                         | -       | -                                     | -             |
| 75       | HypMe    | nd             | Yes   | -                       | -                         | -       | -                                     | -             |
| 76       | HypMe    | nd             | Yes   | -                       | -                         | -       | -                                     | -             |
| 77       | DEL      | G1 T1          | No    | 440 del T               | 440 del T                 | 1       | F76fsX158                             | FS            |
| 78       | DEL      | G1 T1          | No    | 8161-8162 insT          | 685-686 insT              | 3       | L158fsX173                            | FS            |
| 79       | DEL      | G1 T1a         | No    | 512 del C               | 512 del C                 | 1       | T100fsX158                            | FS            |
| 80       | DEL      | G1 T1a         | No    | 5004 T>C                | IVS2+3 A>C                | IVS2+2  | Splicing effect                       | Spl           |
| 81       | DEL      | G1 T1b         | No    | 421 G>T                 | 421 G>T                   | 1       | E70X                                  | Non           |
| 82       | DEL      | G1             | No    | 374-375 insG            | 374-375 insG              | 1       | m54fsX131                             | FS            |
| 83       | DEL      | G2 T1          | No    | 4937 ins2               | 611 ins2                  | 2       | T133fsX159                            | FS            |
| 84       | DEL      | G2 T1          | No    | 8155 ins2               | 678 ins2                  | 3       | Y156fsX159                            | FS            |
| 85       | DEL      | G2 T1a         | No    | 499-509 del11 ins3      | 499-509 del11 ins3        | 1       | Q96fsX128                             | FS            |
| 86       | DEL      | G2 T1a         | No    | 287 C>T, 8219-8221 del2 | 287 C>T, 743-744 del2     | 1, 3    | P25L, R177fsX94                       | MS, FS        |
| 87       | DEL      | G2 T1a         | No    | 8168 del A ins6         | 692 del A ins6            | 3       | E160fsX171                            | FS            |
| 88       | DEL      | G2 T1a         | No    | 8214 C>A                | 738 C>A                   | 3       | Y175X                                 | Non           |
| 89       | DEL      | G2 T1a         | No    | 8191-8195 del5          | 715-719 del5              | 3       | S168fsX171                            | FS            |
| 90       | DEL      | G2 T1b         | No    | 4943 delT               | 617 delT                  | 2       | L135fsX158                            | FS            |
| 91       | DEL      | G2 T1b         | No    | 5005 A>C                | IVS2+3 A>C                | IVS2+3  | Splicing effect                       | Spl           |
| 92       | DEL      | G2 T1b         | No    | 8279-8285 del7          | 803-809 del7              | 3       | D197fsX199                            | FS            |
| 93       | DEL      | G2 T2          | No    | 520- Deleted            | 520- Deleted              | 1       | P103truncated                         | truncated     |
| 94       | DEL      | G2 T2          | No    | 553-556 del4            | 553+3 del4                | 1       | Splicing effect                       | Spl/FS        |
| 95       | DEL      | G2 T2          | No    | 482-488 del 7           | 482-488 del 7             | 1       | N90fsX156                             | FS            |
| 96       | DEL      | G2 T2          | No    | 4939-4942 del4          | 613-616 del4              | 2       | Y134fsX157                            | FS            |
| 97       | DEL      | G2 T3          | No    | 4885-4890 del 6         | 559 del 6                 | 2       | L116IFD                               | IFD           |
| 98       | DEL      | G2 T3a         | No    | 447 del T               | 447 del T                 | 1       | N78fsX158                             | FS            |
| 99       | DEL      | G2 T3a         | No    | 500-520 del21           | 500-521 del21             | 1       | Q96IFD                                | IFD           |
| 100      | DEL      | G2 T3b         | No    | 4983 del T              | 657 del T                 | 2       | F148fsX157                            | FS            |
| 101      | DEL      | G2 T3b         | No    | 8160 del T              | 684 del T                 | 3       | T157fsX158                            | FS            |
| 102      | DEL      | G2             | No    | 544 del A               | 544 del A                 | 1       | S111fsX158                            | FS            |
| 103      | DEL      | G2             | No    | 4989-4991 del3 ins2     | 663-665 del3 ins2         | 2       | N150fsX158                            | FS            |
| 104      | DEL      | G2             | No    | 4884 ins C              | 558 ins C                 | 2       | H115fs131                             | FS            |
| 105      | DEL      | G2             | No    | 8187 del C              | 711 del C                 | 3       | V166fsX169                            | FS            |
| 106      | DEL      | G2             | No    | 8179 C>T                | 703 C>T                   | 3       | Q164X                                 | Non           |
| 107      | DEL      | G2             | No    | 8275 A>T                | 799 A>T                   | 3       | K196X                                 | Non           |
| 108      | DEL      | G2             | No    | 8176-8194 del 19 insG   | 700-718 del 19 insG       | 3       | L163IFD                               | IFD           |
| 109      | DEL      | G3 T1          | Yes   | 446 ins C               | 446 ins C                 | 1       | N78fsX131                             | FS            |
| 110      | DEL      | G3 T1a         | No    | 523 del G ins 3         | 523 del G ins 3           | 1       | G104fsX159                            | FS            |
| 111      | DEL      | G3 T1a         | No    | 384-409 del26           | 384-409 del26             | 1       | G57fsX122                             | FS            |
| 112      | DEL      | G3 T1b         | No    | 416-422 del7 insT       | 416-422 del7 insT         | 1       | S68IFD                                | IFD           |
| 113      | DEL      | G3 T1b         | No    | 485 delT                | 485 delT                  | 1       | F91fsX158                             | FS            |
| 114      | DEL      | G3 T2          | No    | 544-557 del14, 8227 A>G | 544-553+4 del14, 751 A>G  | 1, 3    | S111fsX115, I180V                     | FS/Spl, MS    |
| 115      | DEL      | G3 T2          | No    | 4965 delT               | 638 delT                  | 2       | V142fsX158                            | FS            |
| 116      | DEL      | G3 T3a         | No    | 424-427 del4            | 424-427 del4              | 1       | P71fsX157                             | FS            |
| 117      | DEL      | G3 T3a         | No    | 4889 G>A                | 563 G>A                   | 2       | W117X                                 | Non           |
| 118      | DEL      | G3 T3a         | No    | 8146-8160 del15         | S2-(7-1) del7, 677-684 de | IVS2, 3 | Splicing effect                       | Spl/FS        |
| 119      | DEL      | G3 T3b         | No    | 384-409 del26           | 384-409 del26             | 1       | G57fsX122                             | FS            |
| 120      | DEL      | G3             | No    | 375 ins2                | 375 ins2                  | 1       | M54fsX67                              | FS            |
| 121      | DEL      | G4 T0          | No    | 8163-8165 del3 insC     | 687-689 del 3 insC        | 3       | I158fsX165                            | FS            |
| 122      | DEL      | G4 T2          | No    | 4944-4946 del3          | 618-620 del3              | 2       | L135IFD                               | IFD           |
| 123      | DEL      | G4 T3          | No    | 555 T>A                 | 553+2 T>A                 | IVS1+1  | Splicing effect                       | Spl           |
| 124      | DEL      | G4 T3a         | No    | 8229 del C              | 753 del C                 | 3       | I180fsX201                            | FS            |
| 125      | DEL      | nd             | No    | 482 del A               | 482 del A                 | 1       | N90fsX158                             | FS            |
| 126      | DEL      | nd             | No    | 512-514 del3 insA       | 512-514 del3 insA         | 1       | T100fsX130                            | FS            |
| 127      | DEL      | nd             | No    | 4966 del G              | 640 del G                 | 2       | D143fsX158                            | FS            |
| 128      | DEL      | nd             | No    | 8202 del G              | 726 del G                 | 3       | K171fsX201                            | FS            |

**Table S4. Normalized values of indicated protein levels in all samples of kidneys (left) and RCC tumors (right) where meaningful values were obtained for all proteins of interest.** The same ID number is used to indicate samples where kidneys and tumors are from the same patient, and correspond to the ID numbers in Table S3. Each value is an average of at least two independent runs and quantification procedures. While tumor stage is known for some tumors, it is not shown in the table because we did not detect any meaningful correlation between the levels of the investigated proteins and tumor stage. Note that for some statistical analyses in Figures 1, 2, and 3 a log2 transformation of these normalized values was used (data not shown).

| Kidney ID | Rpb1(OH) | Rpb1(S5P)   | Rpb1     | PHD1     | PHD2     | PHD3     | VHL      | Tumor ID | VHL Gene | Tumor Grade | Rpb1(OH) | Rpb1(S5P)   | Rpb1     | PHD1     | PHD2     | PHD3     |
|-----------|----------|-------------|----------|----------|----------|----------|----------|----------|----------|-------------|----------|-------------|----------|----------|----------|----------|
| 1         | 0.779134 | 0.330303874 | 0.675807 | 0.351504 | 0.602262 | 0.734235 | 0.149277 | 1        | WT       | G2          | 7.610721 | 2.609797488 | 2.166894 | 7.549522 | 3.209464 | 2.30729  |
| 2         | 0.852668 | 1.403032937 | 0.600851 | 1.176604 | 0.540309 | 0.99428  | 1.032996 | 2        | WT       | G2          | 4.221295 | 2.928816489 | 0.934721 | 2.853641 | 2.044011 | 1.090349 |
| 4         | 1.399742 | 1.542422989 | 0.918707 | 0.459954 | 1.172805 | 0.95796  | 0.643101 | 4        | WT       | G2          | 2.83374  | 0.912482714 | 2.851552 | 5.752435 | 0.066321 | 2.53494  |
| 5         | 2.086502 | 2.9323137   | 0.178467 | 0.117408 | 0.185177 | 0.319598 | 0.404281 | 5        | WT       | G2          | 10.04669 | 0.433463901 | 1.961252 | 4.26345  | 1.94647  | 4.800583 |
| 7         | 1.73543  | 0.660043959 | 1.701935 | 0.703419 | 1.002106 | 1.813295 | 1.034266 | 6        | WT       | G2          | 4.17295  | 1.671309893 | 1.394931 | 5.853612 | 2.256066 | 1.822048 |
| 8         | 1.529465 | 2.392883249 | 1.142019 | 0.718516 | 0.978171 | 1.620433 | 1.233934 | 7        | WT       | G2          | 12.2131  | 0.858607543 | 1.716053 | 6.195441 | 0.170077 | 1.621158 |
| 10        | 1.238125 | 2.140309109 | 1.283523 | 1.362834 | 1.650705 | 1.138483 | 0.167285 | 8        | WT       | G2          | 3.144421 | 0.840287077 | 1.32382  | 2.855549 | 1.234943 | 1.331657 |
| 11        | 0.439318 | 0.617201666 | 1.01269  | 1.192838 | 1.261866 | 1.210608 | 0.462562 | 10       | WT       | G2          | 3.532139 | 0.412943931 | 1.261965 | 3.623387 | 1.141059 | 1.519409 |
| 12        | 1.525342 | 0.368016167 | 0.846772 | 0.829452 | 0.679163 | 0.889435 | 1.471188 | 11       | WT       | G2          | 1.460306 | 1.626966231 | 1.256497 | 3.978753 | 0.757928 | 2.723771 |
| 13        | 0.711689 | 1.265966774 | 0.29769  | 0.974965 | 0.047785 | 0.719737 | 0.564606 | 12       | WT       | G2          | 3.87533  | 2.061466465 | 1.826423 | 2.693131 | 2.347028 | 0.306002 |
| 14        | 0.634307 | 0.254380638 | 0.64452  | 0.070996 | 0.070996 | 0.70618  | 0.353888 | 13       | WT       | G2          | 4.342426 | 3.087447961 | 2.732057 | 14.88925 | 5.96958  | 2.418347 |
| 15        | 1.032809 | 0.521782931 | 0.746261 | 0.424122 | 1.932919 | 0.877271 | 2.518942 | 14       | WT       | G2          | 8.545708 | 1.41363241  | 1.23494  | 9.104568 | 3.781291 | 0.673659 |
| 16        | 0.848916 | 0.684038133 | 0.279306 | 0.654626 | 0.471584 | 0.857188 | 1.514478 | 15       | WT       | G2          | 2.527555 | 0.615177313 | 0.212113 | 1.868718 | 1.725931 | 0.245523 |
| 17        | 0.977678 | 0.377061674 | 0.754522 | 1.41923  | 1.767182 | 1.828016 | 0.619576 | 16       | WT       | G2          | 0.706526 | 0.974716435 | 0.639101 | 3.679075 | 0.083415 | 1.788212 |
| 18        | 1.830559 | 0.16488071  | 0.722557 | 0.91794  | 1.15639  | 3.403458 | 0.983551 | 17       | WT       | G2          | 3.126437 | 0.999783556 | 1.713818 | 1.771628 | 2.157587 | 0.362602 |
| 19        | 1.014508 | 0.050713271 | 0.329183 | 0.174989 | 0.116834 | 1.399744 | 0.30872  | 18       | WT       | G2          | 5.698271 | 1.910628554 | 0.742363 | 1.955665 | 1.797571 | 0.27312  |
| 20        | 1.104317 | 0.6800587   | 0.426616 | 0.625111 | 0.884925 | 0.902793 | 0.639178 | 19       | WT       | G2          | 2.249171 | 1.807538702 | 0.730466 | 4.593919 | 0.96836  | 0.657196 |
| 21        | 1.224991 | 0.243276298 | 0.702925 | 0.974546 | 0.337203 | 0.870618 | 0.153836 | 20       | WT       | G2          | 2.01575  | 0.619447536 | 0.177615 | 6.155768 | 1.334911 | 0.287366 |
| 23        | 1.234885 | 0.767624921 | 0.891906 | 1.07107  | 1.076205 | 1.204561 | 2.479155 | 21       | WT       | G2          | 15.90326 | 2.356500303 | 1.559703 | 26.54102 | 4.652444 | 6.758368 |
| 24        | 0.484898 | 3.025389807 | 0.883321 | 0.947498 | 1.385623 | 1.2104   | 0.207341 | 23       | WT       | G2          | 0.639568 | 0.63622467  | 0.527932 | 1.801526 | 0.820324 | 0.075701 |
| 25        | 0.855548 | 1.209648434 | 0.824362 | 0.753569 | 0.332653 | 1.299855 | 2.649292 | 24       | WT       | G2          | 10.82134 | 2.066354159 | 0.301164 | 3.480229 | 0.928283 | 1.146996 |
| 26        | 1.021742 | 0.822667153 | 0.786866 | 1.343752 | 1.40269  | 1.156253 | 0.131166 | 26       | WT       | G2          | 0.405188 | 0.751005193 | 0.300873 | 3.602127 | 1.794225 | 0.125668 |
| 27        | 0.363271 | 0.649626853 | 0.435652 | 0.386448 | 0.053826 | 1.209378 | 3.158267 | 28       | WT       | G2          | 3.331607 | 0.779156723 | 1.386426 | 6.177442 | 2.459399 | 1.208647 |
| 29        | 2.048585 | 0.422187099 | 0.638977 | 0.710106 | 0.935307 | 1.522553 | 2.451929 | 29       | WT       | G3          | 4.977022 | 4.99826329  | 1.144375 | 28.0426  | 0.854764 | 2.453674 |
| 31        | 2.234053 | 1.023556791 | 0.129195 | 0.490583 | 3.879793 | 1.194947 | 0.113855 | 31       | WT       | G3          | 2.154387 | 0.253352712 | 0.644823 | 3.273449 | 0.0895   | 1.12008  |
| 32        | 0.505768 | 0.474709321 | 0.995073 | 0.95836  | 1.560713 | 1.153602 | 0.884373 | 32       | WT       | G3          | 2.0051   | 1.129993914 | 1.858506 | 8.307124 | 2.769522 | 1.475267 |
| 33        | 1.304056 | 2.718241413 | 0.966777 | 1.090319 | 1.497746 | 0.892243 | 0.493036 | 33       | WT       | G3          | 1.418504 | 0.824179367 | 0.397504 | 0.51321  | 0.728931 | 0.491974 |
| 34        | 0.171719 | 0.997167073 | 0.198455 | 0.096584 | 0.074189 | 1.80349  | 0.116223 | 34       | WT       | G3          | 0.53923  | 0.653988007 | 1.732395 | 0.289925 | 0.392766 | 1.219036 |
| 35        | 0.495588 | 0.574924406 | 0.50145  | 0.898915 | 0.125229 | 3.188219 | 1.73294  | 35       | WT       | G3          | 1.91411  | 1.169328133 | 1.453236 | 1.460506 | 1.040441 | 0.087264 |
| 41        | 0.482683 | 0.096620516 | 0.506842 | 1.149068 | 0.043023 | 0.996746 | 0.743588 | 36       | WT       | G3          | 1.124474 | 0.864471544 | 0.433973 | 0.490456 | 0.34083  | 0.495563 |
| 47        | 1.511765 | 0.257129455 | 1.131149 | 0.837439 | 0.548138 | 0.772244 | 0.221933 | 37       | WT       | G3          | 1.273205 | 0.630082856 | 1.609168 | 1.344365 | 0.761081 | 1.168957 |
| 48        | 1.360669 | 0.293700695 | 0.571919 | 0.390878 | 0.133033 | 1.279247 | 1.171562 | 38       | WT       | G3          | 1.322905 | 0.134880849 | 1.733695 | 1.678658 | 0.072821 | 2.093644 |
| 49        | 2.862962 | 0.247613326 | 0.760236 | 1.052349 | 0.860655 | 1.272721 | 1.145268 | 41       | WT       | G4          | 1.020683 | 0.158251636 | 2.406644 | 1.04664  | 0.423803 | 0.482065 |
| 50        | 1.601027 | 0.489600067 | 0.329988 | 1.625675 | 0.706196 | 8.591856 | 1.773688 | 42       | WT       | G4          | 1.245149 | 10.56668652 | 1.893975 | 1.334592 | 0.449199 | 2.113997 |
| 51        | 2.040814 | 0.81862637  | 1.218039 | 2.295907 | 1.119129 | 9.206772 | 1.278299 | 43       | WT       | n/a         | 2.79529  | 0.443972722 | 1.371594 | 4.091988 | 0.802756 | 0.84924  |
| 52        | 1.010401 | 1.022906864 | 0.715666 | 1.569299 | 0.892665 | 9.001847 | 1.63274  | 44       | WT       | n/a         | 14.62169 | 1.097825758 | 2.328005 | 17.94265 | 2.603325 | 1.991075 |
| 53        | 3.710821 | 0.461967208 | 0.843589 | 1.797918 | 0.690993 | 1.620706 | 0.066228 | 46       | WT       | n/a         | 0.777681 | 0.809551446 | 2.919566 | 3.66551  | 0.643682 | 1.074374 |
| 55        | 2.559682 | 2.430764061 | 0.988361 | 2.353551 | 1.135427 | 5.345315 | 1.523431 | 47       | PM       | G1          | 0.413175 | 0.709353049 | 0.585986 | 0.129344 | 1.142549 | 0.700506 |
| 59        | 1.765817 | 0.481772374 | 0.631826 | 1.595579 | 0.19648  | 1.492636 | 0.327719 | 48       | PM       | G1          | 4.064763 | 0.79218263  | 1.274302 | 0.135973 | 0.974876 | 0.077954 |
| 60        | 1.191854 | 0.401445276 | 0.407765 | 0.476334 | 1.031579 | 3.930477 | 1.099106 | 49       | PM       | G1          | 0.653213 | 1.96730497  | 0.364796 | 1.487869 | 2.466269 | 0.798019 |
| 61        | 1.478438 | 0.408591186 | 0.754191 | 0.732454 | 0.296469 | 0.944954 | 0.502396 | 50       | PM       | G2          | 0.729352 | 0.819891976 | 0.211021 | 0.397197 | 1.468764 | 0.545863 |
| 62        | 1.536529 | 0.229698056 | 0.769479 | 0.465753 | 0.591049 | 1.567046 | 1.164647 | 51       | PM       | G2          | 0.883799 | 0.823782647 | 0.591822 | 1.753487 | 1.285709 | 1.203407 |
| 63        | 1.535551 | 2.012883433 | 0.568629 | 0.845062 | 0.485807 | 0.715738 | 0.241184 | 52       | PM       | G2          | 0.74397  | 1.35523819  | 0.194719 | 0.311698 | 1.540084 | 0.097874 |
| 64        | 0.912197 | 0.488389451 | 0.685033 | 0.518994 | 0.099616 | 0.576273 | 1.421832 | 53       | PM       | G2          | 1.724725 | 0.395567366 | 2.320984 | 1.045391 | 0.22306  | 1.506493 |
| 65        | 0.93767  | 2.24105825  | 0.671299 | 1.257413 | 1.056329 | 0.702945 | 2.146823 | 54       | PM       | G2          | 1.720062 | 1.787136817 | 0.174928 | 0.557648 | 0.426695 | 0.554927 |
| 66        | 0.80784  | 0.440106076 | 0.187093 | 0.834032 | 0.201834 | 0.576493 | 1.856333 | 55       | PM       | G2          | 8.014753 | 0.444387833 | 1.744045 | 2.957151 | 2.850078 | 0.628903 |
| 67        | 0.431643 | 0.152568349 | 0.118973 | 0.133646 | 0.337996 | 0.241392 | 4.396002 | 57       | PM       | G3          | 2.071958 | 0.689497641 | 2.002178 | 0.82125  | 0.737635 | 0.553994 |
| 68        | 1.0543   | 0.385725553 | 0.120433 | 0.865638 | 0.198605 | 0.731791 | 4.240861 | 58       | PM       | G3          | 0.271502 | 0.644634107 | 0.17898  | 0.679413 | 1.171833 | 0.791511 |
| 69        | 0.895915 | 1.070821074 | 0.195994 | 0.392517 | 0.196027 | 0.114244 | 0.66725  | 59       | PM       | G3          | 0.365757 | 0.82959042  | 0.92952  | 0.626758 | 0.308191 | 0.512916 |
| 70        | 1.915905 | 0.228843467 | 0.181357 | 0.595851 | 0.075702 | 0.931205 | 1.764072 | 60       | PM       | G3          | 1.698567 | 0.547605748 | 1.488895 | 1.012565 | 1.710302 | 0.373082 |
| 74        | 2.041246 | 3.503818277 | 0.814435 | 0.880212 | 0.310937 | 0.978289 | 0.49049  | 61       | PM       | G3          | 0.478659 | 1.572846238 | 1.13507  | 1.575503 | 1.229741 | 0.307612 |
| 76        | 2.17015  | 4.443728238 | 1.534715 | 1.917723 | 0.716948 | 1.201576 | 2.913961 | 62       | PM       | G3          | 0.660622 | 1.80883773  | 0.834177 | 0.860632 | 0.82084  | 1.163759 |
| 77        | 1.266122 | 4.404313408 | 0.369737 | 0.128792 | 0.365433 | 2.118486 | 0.061251 | 64       | HyMe     | G1          | 2.172738 | 2.932247086 | 2.174975 | 1.380005 | 1.175618 | 1.278285 |
| 78        | 0.546406 | 0.322566838 | 0.460629 | 0.402672 | 0.602208 | 1.668013 | 2.650926 | 65       | HyMe     | G2          | 0.911852 | 0.703876368 | 2.150089 | 13.54938 | 2.675955 | 5.850135 |
| 80        | 1.160283 | 0.892027295 | 0.535365 | 0.714516 | 0.670535 | 1.960343 | 0.668234 | 66       | HyMe     | G2          | 2.878463 | 0.815843689 | 2.374903 | 4.254424 | 1.662132 | 3.220068 |
| 81        | 0.983911 | 0.149940119 | 0.098063 | 0.407764 | 0.428582 | 2.105715 | 1.446902 | 67       | HyMe     | G2          | 0.79097  | 0.656084987 | 1.32907  | 0.9783   | 1.954192 | 0.760038 |
| 82        | 1.223418 | 0.130632071 | 0.500156 | 1.720964 | 1.071939 | 0.886998 | 1.688551 | 69       | HyMe     | G3          | 1.002207 | 2.282286701 | 0.414736 | 0.566107 | 1.059387 | 0.482342 |
| 85        | 1.112827 | 1.882790783 | 0.678788 | 1.825175 | 1.423132 | 0.710859 | 0.095459 | 70       | HyMe     | G3          | 0.801813 | 0.664866943 | 0.165744 | 0.309386 | 1.20129  | 0.534226 |
| 86        | 0.325931 | 0.07670219  | 0.664801 | 0.892664 | 1.415415 | 0.622333 | 2.644109 |          |          |             |          |             |          |          |          |          |
